# Supplementary material for: Identification of a novel prognostic signature based on anoikis-related long non-coding RNAs in colorectal cancer
Source: Research Square preprint supplement (doi:10.21203/rs.3.rs-6829296/v1), 2025-07-15
Supplement: Supplementary file 1 [file d1c05dd8b7071faf2e4b6f58.docx]

Table S1. The Table of 434 anoikis-related genes (ARGs).

| BRMS1 | DAP3 | ZNF304 | BAD | PTEN | MTOR | IGF1R |
| --- | --- | --- | --- | --- | --- | --- |
| PTK2 | BCL2 | MAPK1 | PIK3CA | TLE1 | TIMP1 | ITGA6 |
| NTRK2 | CASP8 | BMF | PAK1 | PDK4 | ITGA2 | ILK |
| BCL2L11 | EGFR | ITGA5 | ITGAV | ERBB2 | BDNF | CFLAR |
| SRC | PTRH2 | MCL1 | MAPK3 | CSPG4 | ANGPTL4 | RHOA |
| HIF1A | STAT3 | TP53 | PTGS2 | CYCS | BSG | CEACAM6 |
| CAV1 | SIK1 | BCL2L1 | BAX | BRAF | AKT2 | CEACAM5 |
| AKT1 | DAPK2 | CASP3 | FN1 | ANXA5 | STK11 | MYBBP1A |
| ITGB1 | CTNNB1 | CDH1 | BCAR1 | BIRC5 | IGF1 | TLE5 |
| E2F1 | LGALS3 | CDKN3 | PIK3CB | PLK1 | ITGA3 | KRAS |
| EGF | BAK1 | CASP9 | CLDN1 | SMAD4 | PTK2B | ITGB3 |
| PIK3CG | ABHD4 | MTDH | MIR26A1 | CDKN1A | MUC1 | TNFRSF10B |
| YAP1 | CD44 | BID | MIR204 | CCND1 | CTTN | THBS1 |
| ITGB4 | ITGA4 | CXCL8 | CDKN1B | PLAUR | CALR | HRAS |
| DAPK1 | FADD | MIR200C | ATF4 | LGALS1 | CDCP1 | CDK11B |
| PIK3R1 | TGFB1 | AR | KLF12 | PYCARD | CHEK2 | CDK11A |
| MAP2K1 | HMCN1 | CDKN2A | MYC | SESN2 | SKP2 | XIAP |
| CXCL12 | MMP2 | MAPK8 | PLAU | NTRK1 | HGF | PPARG |
| IL6 | NQO1 | MMP9 | ETV4 | LAMB3 | TSG101 | EPHA2 |
| MIR145 | BIRC3 | MAPK11 | S100A4 | LAMC2 | MIR200A | SOD2 |
| CCR7 | MMP13 | PTHLH | NTF3 | LAMA3 | SERPINA1 | SIRT3 |
| MSLN | FAS | GLI2 | MIR21 | CDH2 | AKT3 | OLFM3 |
| RAC1 | MTA1 | CXCR4 | MIR124-1 | RELA | CSNK2A1 | CEMIP |
| GRHL2 | MYO5A | RIPK1 | LATS1 | EDIL3 | PRKCA | FBXW7-AS1 |
| NOTCH1 | EDA2R | HMGA1 | HTRA1 | EZH2 | TNFRSF1A | CLU |
| RHOG | CCN6 | TNFSF10 | SIK2 | ZEB2 | FASLG | SPINK1 |
| CCAR2 | ABL1 | CEACAM3 | EIF2AK3 | TLN1 | AFP | CPEB2 |
| CEBPB | BRCA2 | MIR141 | SDCBP | ZEB1 | BNIP3 | EEF2K |
| SATB1 | PARP1 | MET | SPIB | PIN1 | BNIP3L | GLO1 |
| EEF1A1 | DOCK1 | ELANE | MGAT5 | UBE2C | KDM3A | PAK2 |
| ITGA8 | SP1 | KDR | ABHD2 | YWHAZ | LMO3 | LPAR1 |
| PBK | HAVCR2 | MDM2 | TRIM31 | TWIST1 | ZNF32 | SFN |
| LTB4R2 | VTN | PRKCI | MIR1827 | ELK1 | MIR200B | ADCY10 |
| CD63 | INHBB | NFE2L2 | PDGFRB | BMP6 | MIR363 | TRAF2 |
| NOX4 | RANBP9 | RB1 | TLR3 | PRDX4 | MIR525 | PIK3R3 |
| MAVS | PDCD4 | FGF2 | ROCK1 | PTPN11 | TUBB3 | RBL2 |
| RHOB | PRPF4B | HK2 | CPT1A | SLC2A1 | CASP6 | SIRPA |
| CCN2 | SESN1 | KL | NRAS | HMOX1 | PPP2CA | TNFRSF12A |
| CD36 | SESN3 | CRYAB | PLAT | PRKACA | PPP1R13B | CEACAM1 |
| PLG | PHLDA2 | EPHB6 | CASP10 | CBL | CDH3 | BAG1 |
| RAF1 | ZBTB7A | IQGAP1 | PAK4 | PAK3 | LRP1 | APOBEC3G |
| PRKCQ | CD24 | LTF | VEGFA | PIK3R2 | PTK6 | GDF2 |
| MNX1 | BCL2L15 | ITGB5 | SERPINB1 | SLC39A6 | CSK | FBLIM1 |
| VPS37A | SNAI2 | TP73 | MIR181A1 | BIN1 | PIK3C2B | RACK1 |
| COL13A1 | GLUD1 | MAD2L1 | MAP3K1 | TIAM1 | FOXC2 | CCDC80 |
| RAD9A | MYH9 | BCL2L2 | CTBP1 | PDPK1 | ARHGDIB | ANGPTL2 |
| IFI27 | NOTCH3 | SLCO1B3 | CEACAM4 | SMAD7 | ENDOG | HOTAIR |
| ITPRIP | PTPN1 | DLG1 | PXN | RHOC | TAGLN | PRKD1 |
| COL4A2 | TPM1 | PDCD6IP | MALAT1 | CASP2 | JUP | LDHA |
| TNC | FASN | SCRIB | IKBKG | SPP1 | ATF2 | ANXA2 |
| PPP2R5A | RPS6KB1 | TDGF1 | TFDP1 | IRF6 | NKX2-1 | ARHGEF7 |
| BST2 | SIRT1 | EDAR | CRYBA1 | NTRK3 | OCLN | SMARCE1 |
| PPP2R2D | PPP2R1A | SH3GLB1 | ID2 | GNE | TP63 | RBFOX2 |
| CCN1 | CD151 | DYNLL2 | SERPINE1 | XAF1 | CRABP2 | QSOX1 |
| CCDC178 | CTNND1 | TSC2 | FOXO3 | SFRP1 | CEACAM8 | RPS6KA3 |
| MIR30C1 | MMP11 | BAG4 | ACTG1 | MAP2K2 | PITPNC1 | CDC42 |
| MIR30B | CDC25C | MAP3K7 | ARHGDIA | SPHK1 | AFAP1L1 | ONECUT1 |
| MIR10A | BUB3 | F10 | EZR | EHMT2 | HSPB1 | PIP5K1C |
| SHC1 | FER | HSP90B1 | NDRG1 | RAC3 | PCNA | ANKRD13C |
| BUB1 | SETD2 | F3 | STK38 | SIRT6 | GSK3B | CTNNA1 |
| FOXA1 | CDK1 | KRT14 | ACP1 | OGT | NGF | ADAMTSL1 |
| RHOQ | MAOA | S100A7 | SRSF3 | GKN1 | MIR107 | MIR630 |
